# Supplementary material for: Association of Blood Pressure With Cause-Specific Mortality in Mexican Adults
Source: PubMed Central journal article supplement (PMC7519421; doi:10.1001/jamanetworkopen.2020.18141), 2020-09-25
Supplement: jamanetwopen-e2018141-s001.pdf [file jamanetwopen-e2018141-s001.pdf]

## Supplementary Online Content

Tapia-Conyer R, Alegre-Díaz J, Gnatiuc L, et al. Association of blood pressure with cause-specific mortality in Mexican adults. *JAMA Netw Open*. 2020;3(9):e2018141. doi:10.1001/jamanetworkopen.2020.18141

**eFigure 1.** Extent of Regression to the Mean in SBP and DBP Between Baseline and Resurvey, for Each Fifth of the Baseline Distribution

**eFigure 2.** SBP, DBP and Use of Antihypertensive Drugs at Recruitment, by Age and Sex Among 141 074 Participants Without Prior Chronic Disease and Aged 35 to 84 Years at Recruitment

**eFigure 3.** Association of SBP With Cause-Specific Vascular Mortality at Ages 75 to 84 Years

**eFigure 4.** Association of SBP With Vascular Mortality by Age and Sex

**eFigure 5.** Association of SBP With Vascular Mortality at Ages 35 to 74 Years by Levels of Confounders

**eFigure 6.** Association of SBP With Vascular Mortality at Ages 35 to 74 Years Separately by Period of Follow-up

**eFigure 7.** Association of SBP With Cause-Specific Nonvascular Mortality at Ages 35 to 74 Years

**eFigure 8.** Association of SBP With Cause-Specific Nonvascular Mortality at Ages 35 to 74 Years, by History of Previously Diagnosed Diabetes

**eTable 1.** Numbers of Deaths at Ages 35 to 74 Years by Underlying Cause (*ICD-10* code)

**eTable 2.** Baseline Characteristics of 7461 Participants Without Prior Chronic Disease and Aged 75 to 84 Years at Recruitment

**eTable 3.** Baseline Characteristics of 9031 Resurveyed Participants Without Prior Chronic Disease and Aged 35 to 74 Years at Original Study Recruitment, by Sex

**eTable 4.** Comparison of the Informativeness of Different Blood Pressure Indices (Measured Only Once) for Stroke, Ischaemic Heart Disease (IHD) and Vascular Mortality Rates at Ages 35 to 74 Years

This supplementary material has been provided by the authors to give readers additional information about their work.

**eFigure 1: Extent of Regression to the Mean in SBP and DBP Between Baseline and Resurvey, for each Fifth of the Baseline Distribution**

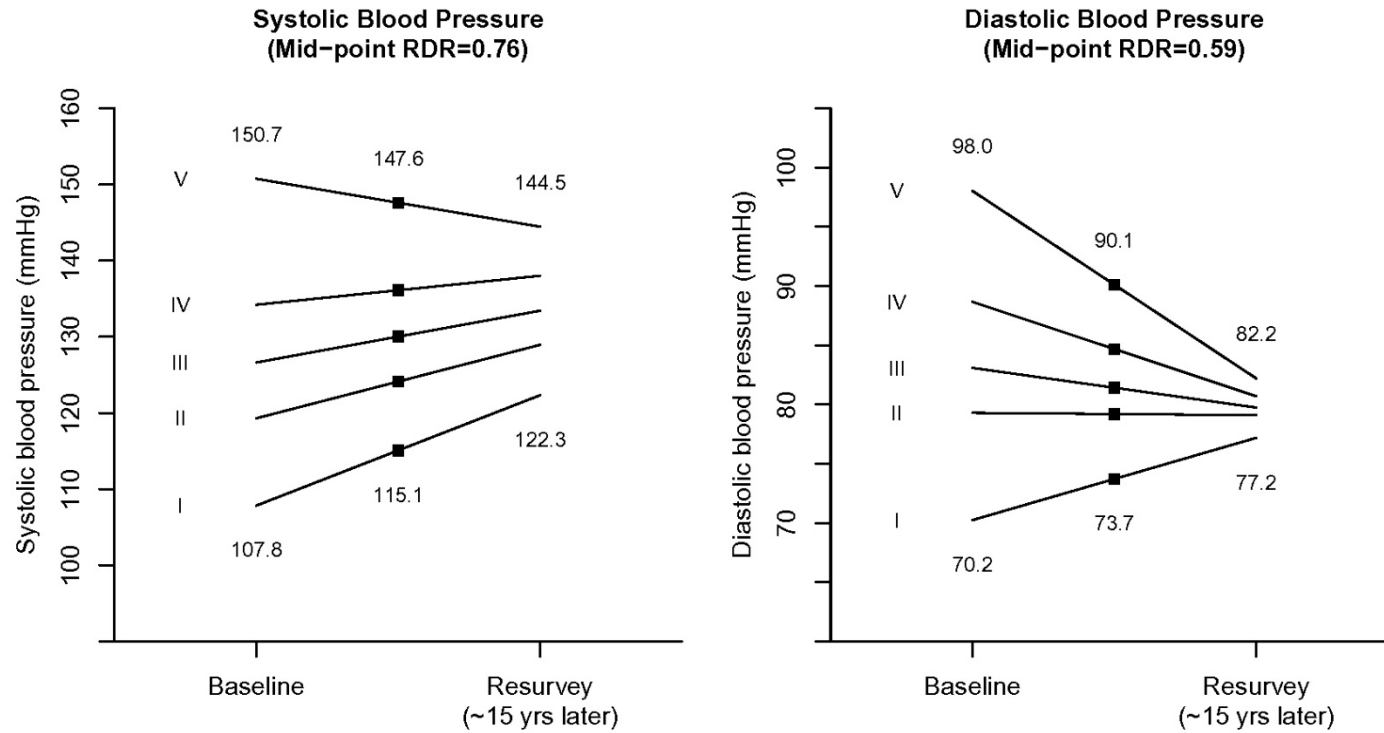

Analysis restricted to participants aged 35–74 and without prior chronic disease (chronic kidney disease, ischemic heart disease, stroke, cirrhosis, cancer, or emphysema) at recruitment, with complete data on analysis covariates (see Table 1) and with complete, plausible, blood pressure data at both recruitment and resurvey. The regression dilution ratio (RDR) is calculated as the ratio of the range of mid-point to baseline means; for example for SBP this equates to  $(147.6 - 115.1) / (150.7 - 107.8) = 0.76$ .

**eFigure 2: SBP, DBP and Use of Antihypertensive Drugs at Recruitment, by Age and Sex Among 141 074 Participants Without Prior Chronic Disease and Aged 35 to 84 Years at Recruitment**

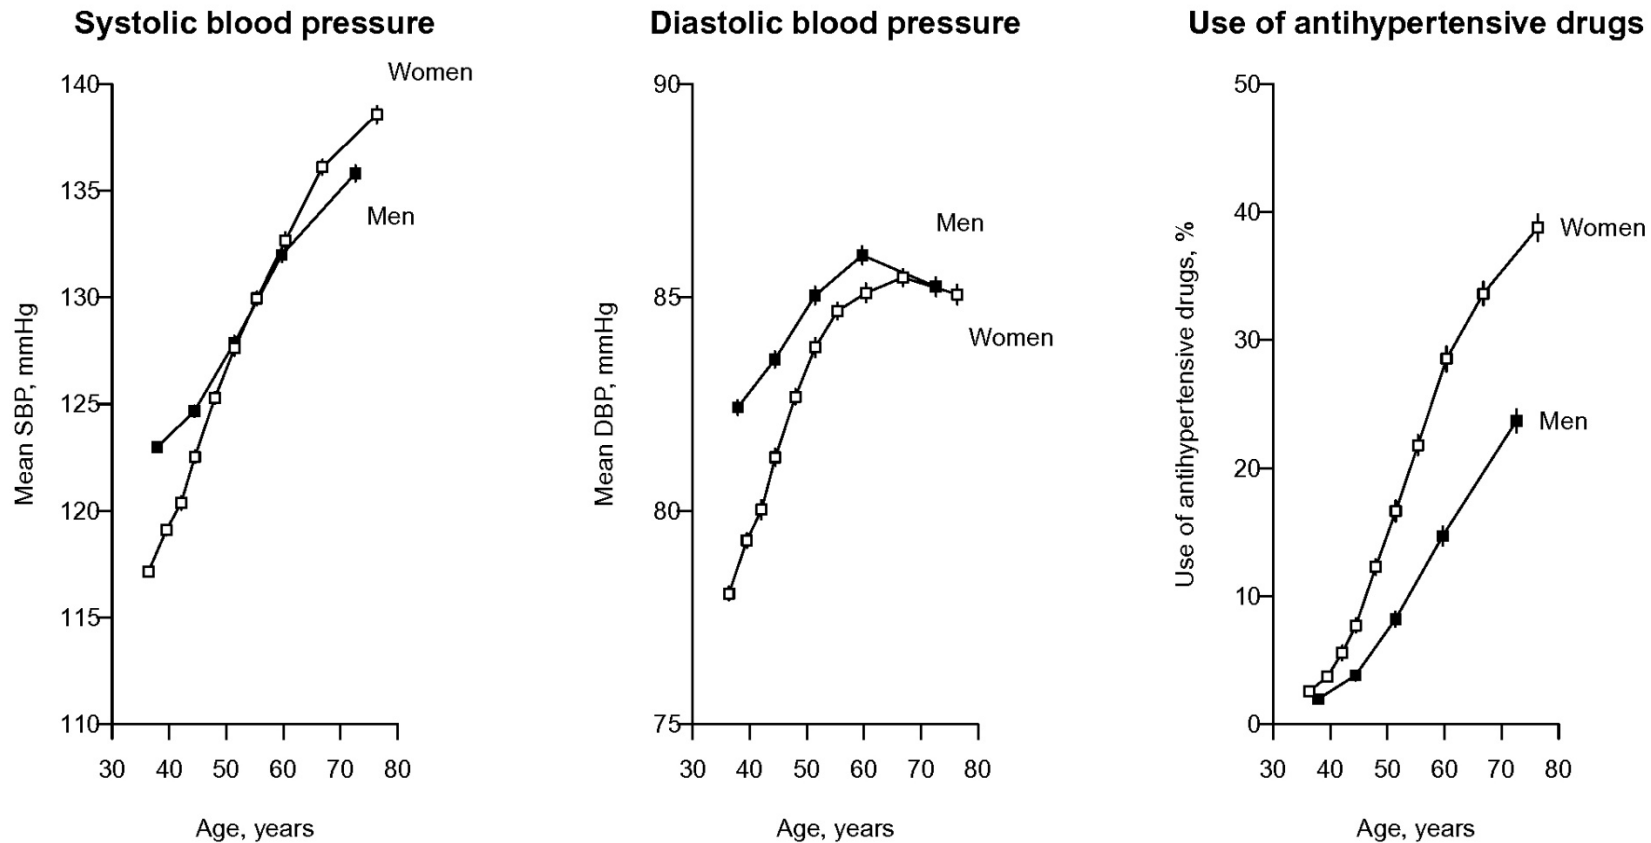

Results shown for five equally-sized groups of men and ten equally-sized groups of women (just under 10 000 participants in each group). Vertical lines representing 95% confidence intervals are drawn, but are mostly contained within the height of each plotting symbol.

**eFigure 3: Association of SBP with Cause-Specific Vascular Mortality at Ages 75 to 84 Years**

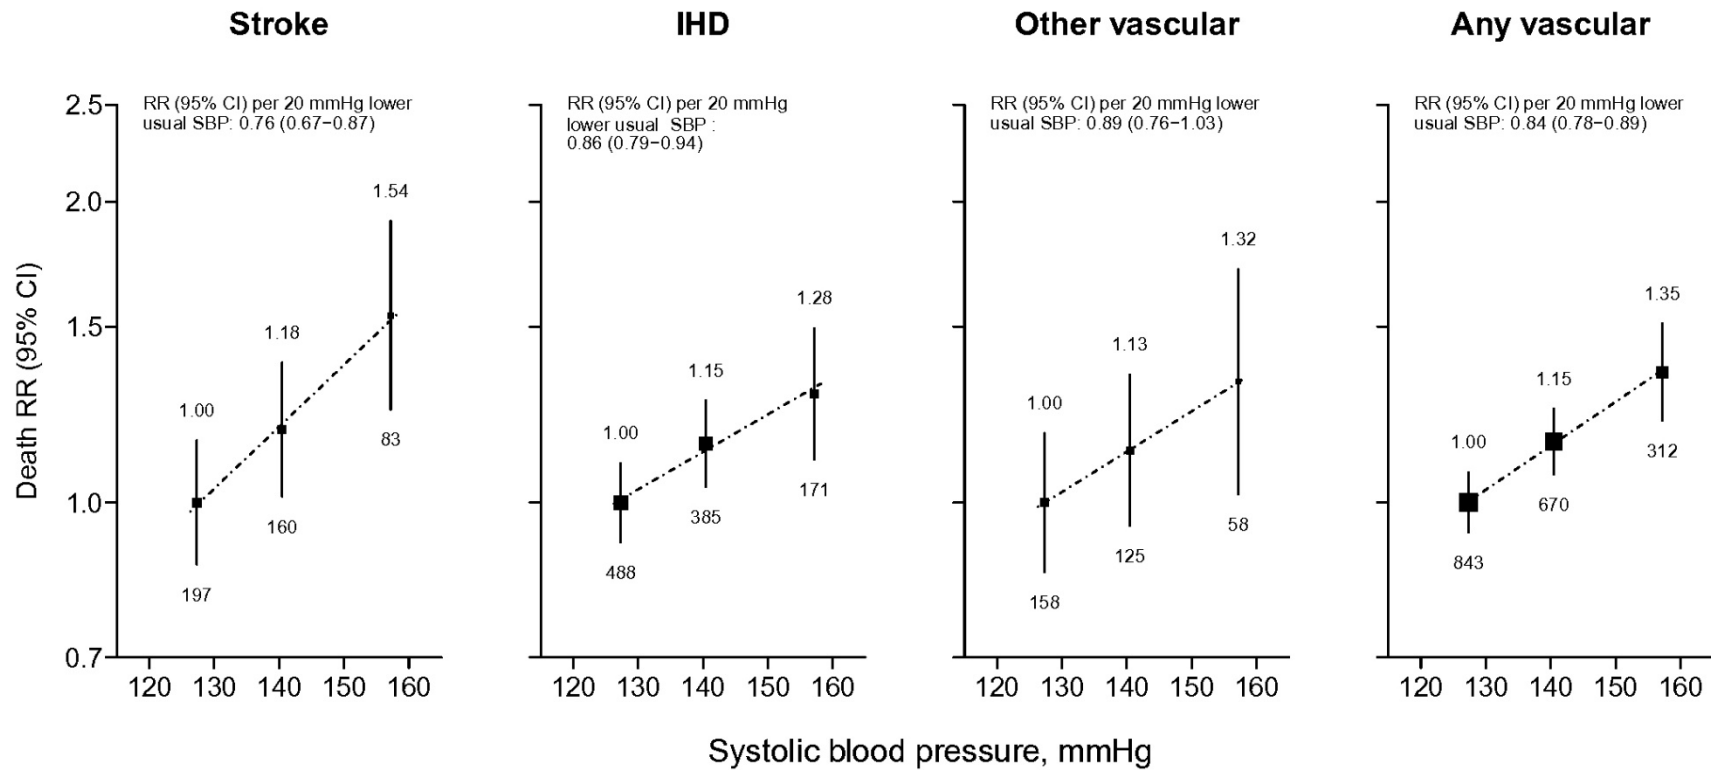

Analyses and exclusions as for Figure 1, except that analyses are for ages 75–84. Due to smaller numbers, the first two, middle two and last two SBP categories have each been combined to give three groups.

**eFigure 4: Association of SBP With Vascular Mortality by Age and Sex**

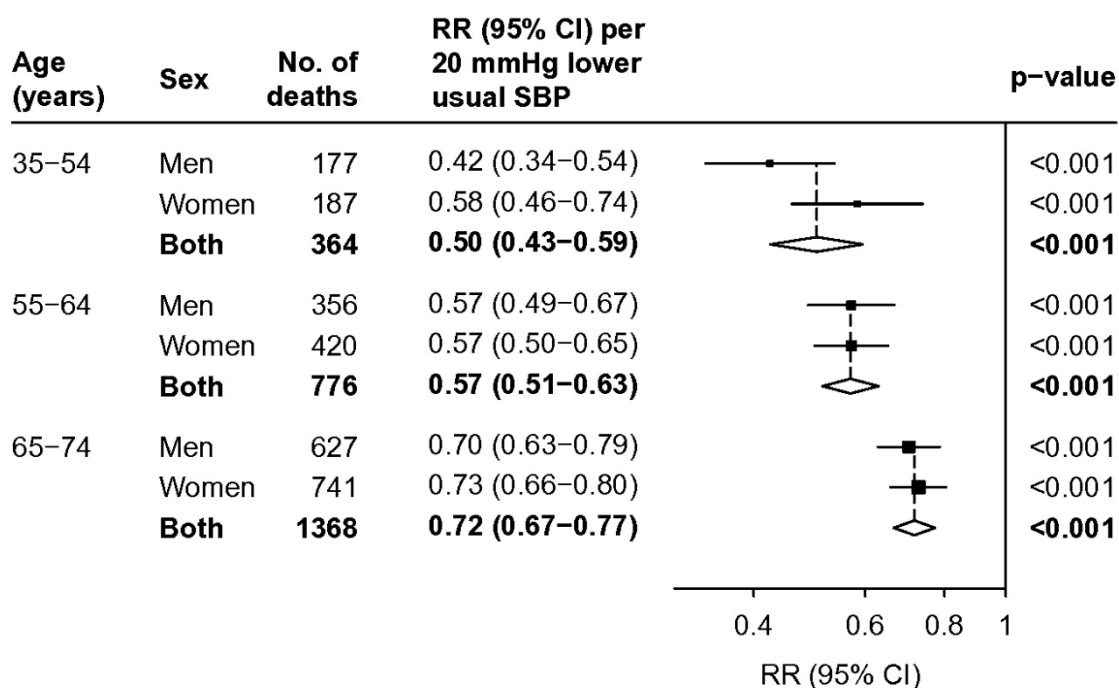

Analyses and exclusions as for Figure 2, except that RRs are instead estimated separately in men and women (and adjusted for diabetes status). Within each age-group shown, the RRs shown are consistent in men and women (all three tests for heterogeneity give  $p > 0.05$ ).

**eFigure 5: Association of SBP with Vascular Mortality at Ages 35 to 74 Years by Levels of Confounders**

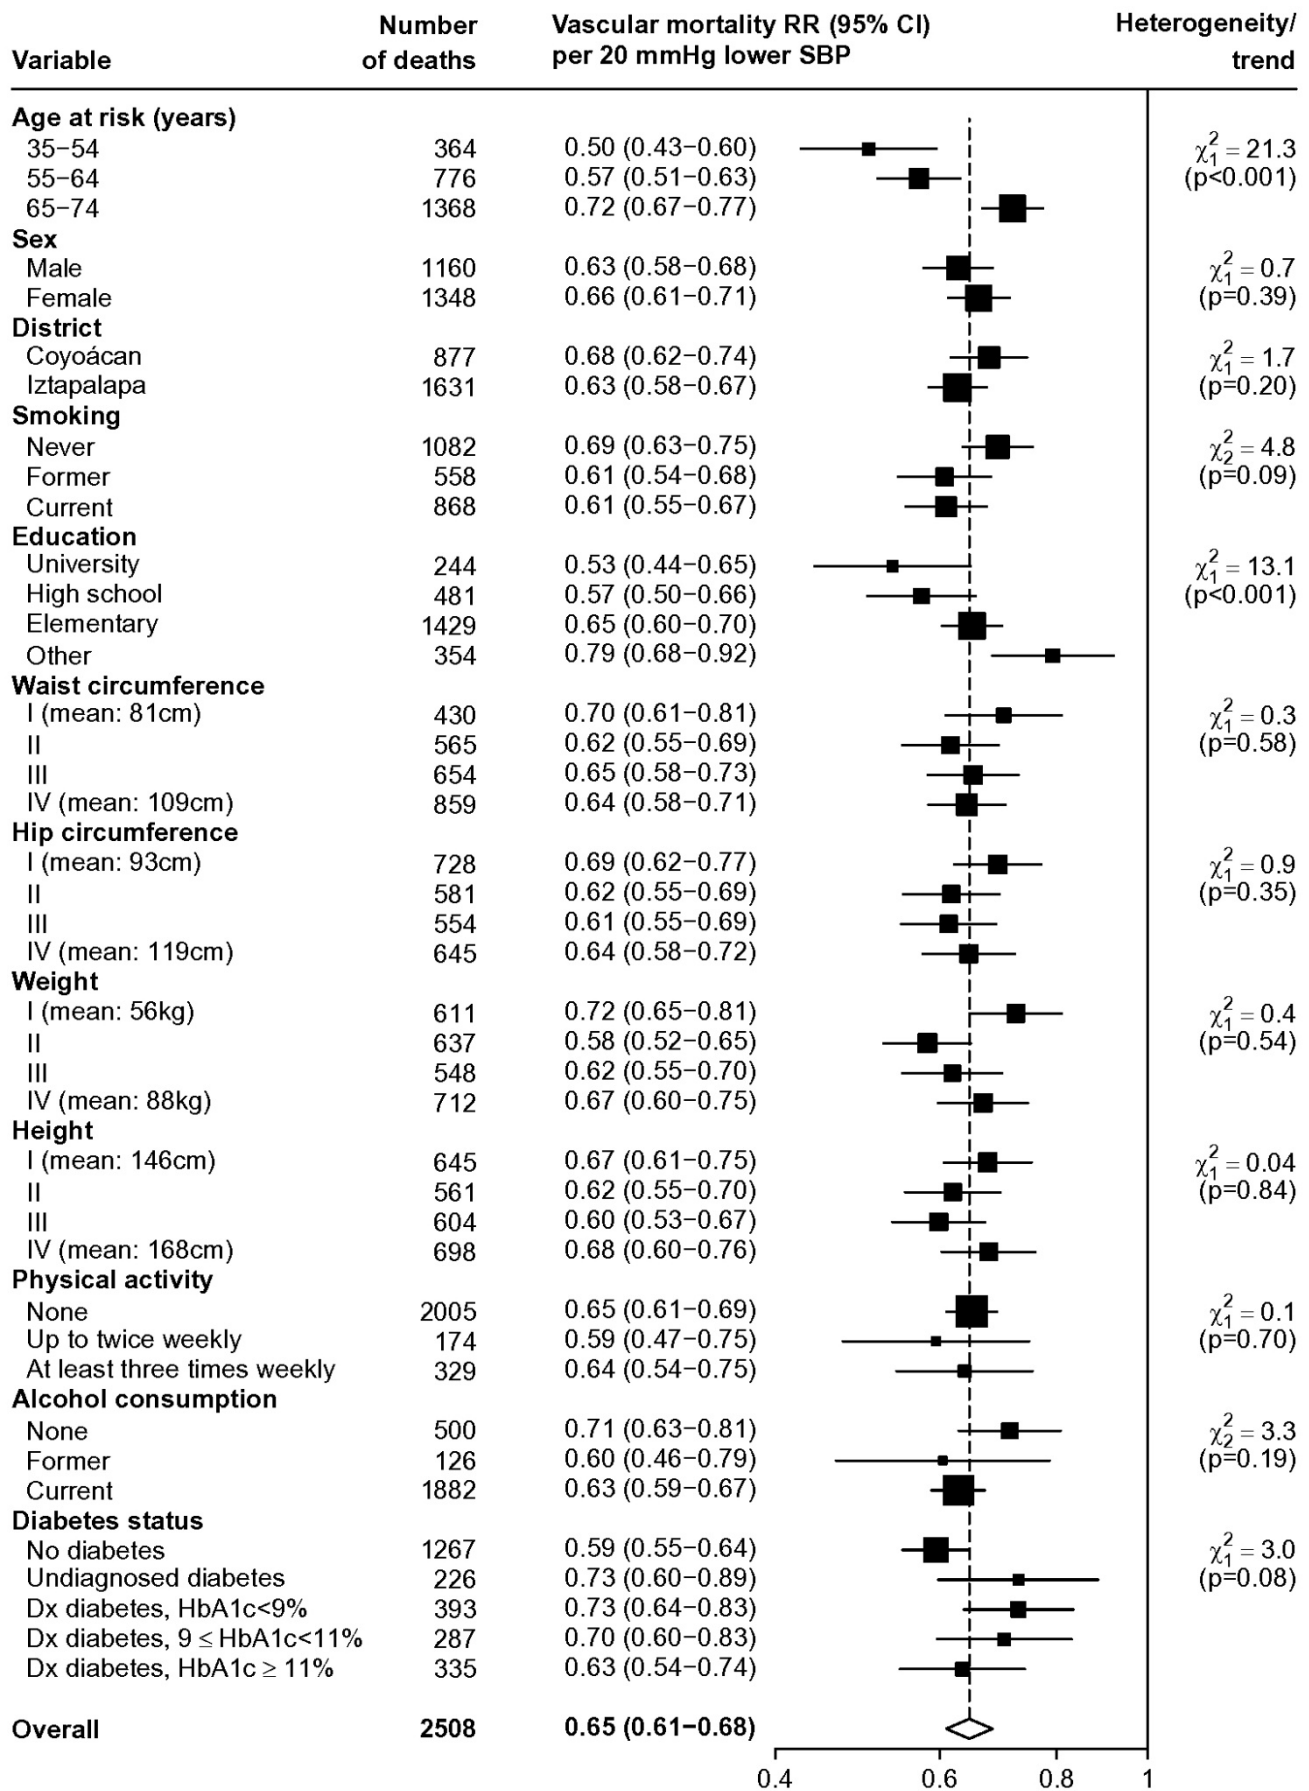

Exclusions and analyses as for Figure 2, with the exception that RRs are now estimated separately by levels of each confounder shown (with mutual adjustment for the other shown confounders).

**eFigure 6: Association of SBP With Vascular Mortality at Ages 35 to 74 Years Separately by Period of Follow-up**

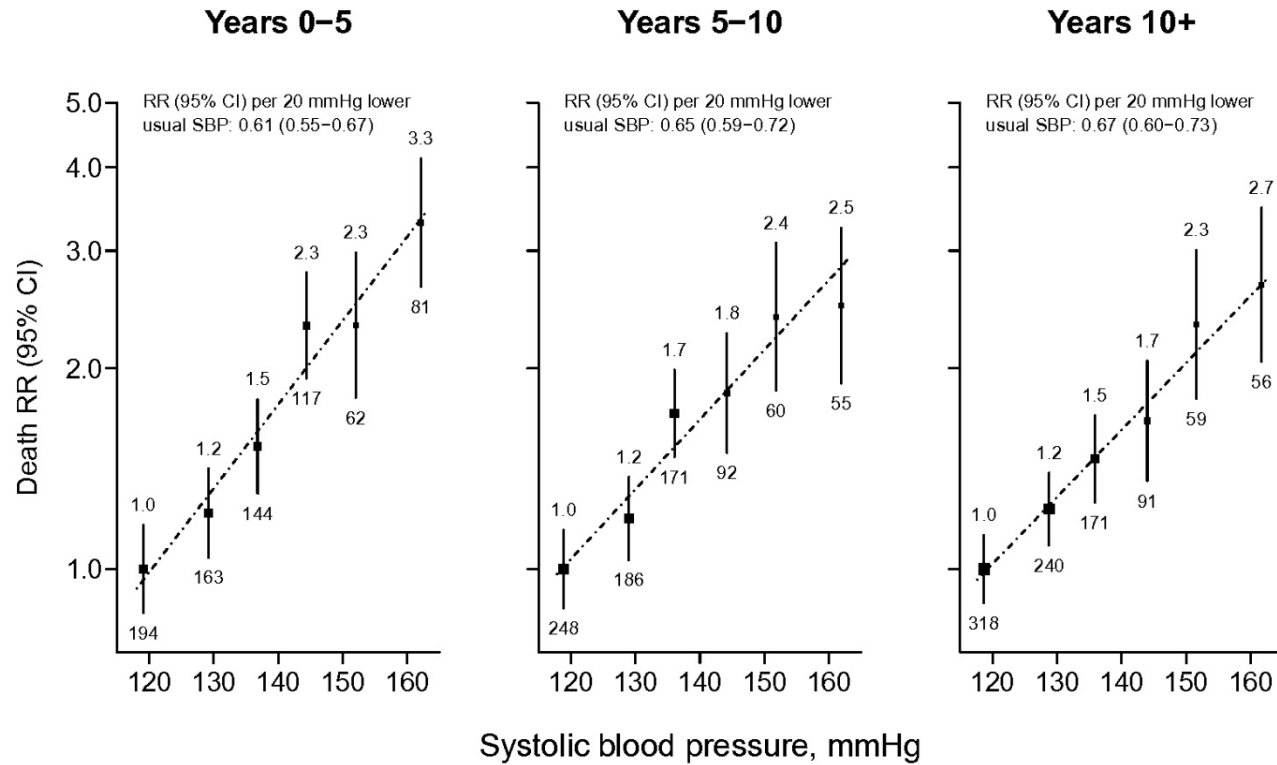

Analyses and exclusions as for Figure 1, except that analyses are now done separately by period of follow-up.

**eFigure 7: Association of SBP with Cause-Specific Nonvascular Mortality at Ages 35 to 74 Years**

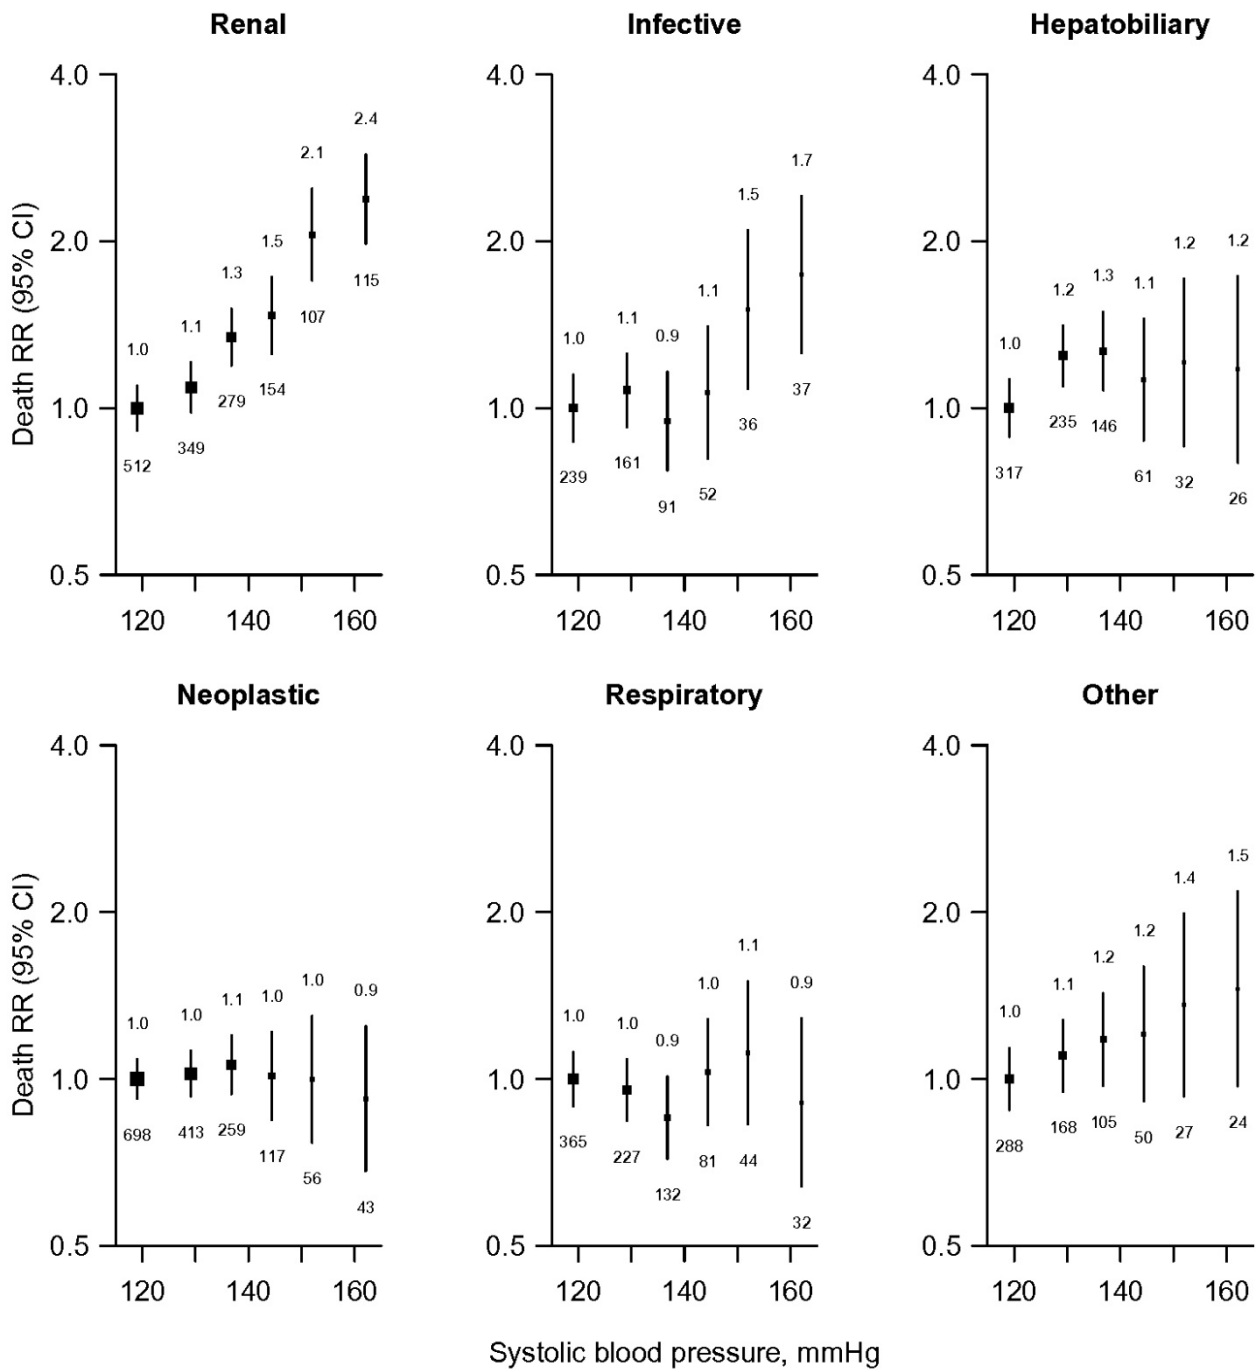

Analyses and exclusions as for Figure 1. Infective endpoint excludes respiratory infections (which are included in respiratory).



**eFigure 8: Association of SBP with Cause-Specific Nonvascular Mortality at Ages 35 to 74 Years, by History of Previously Diagnosed Diabetes**

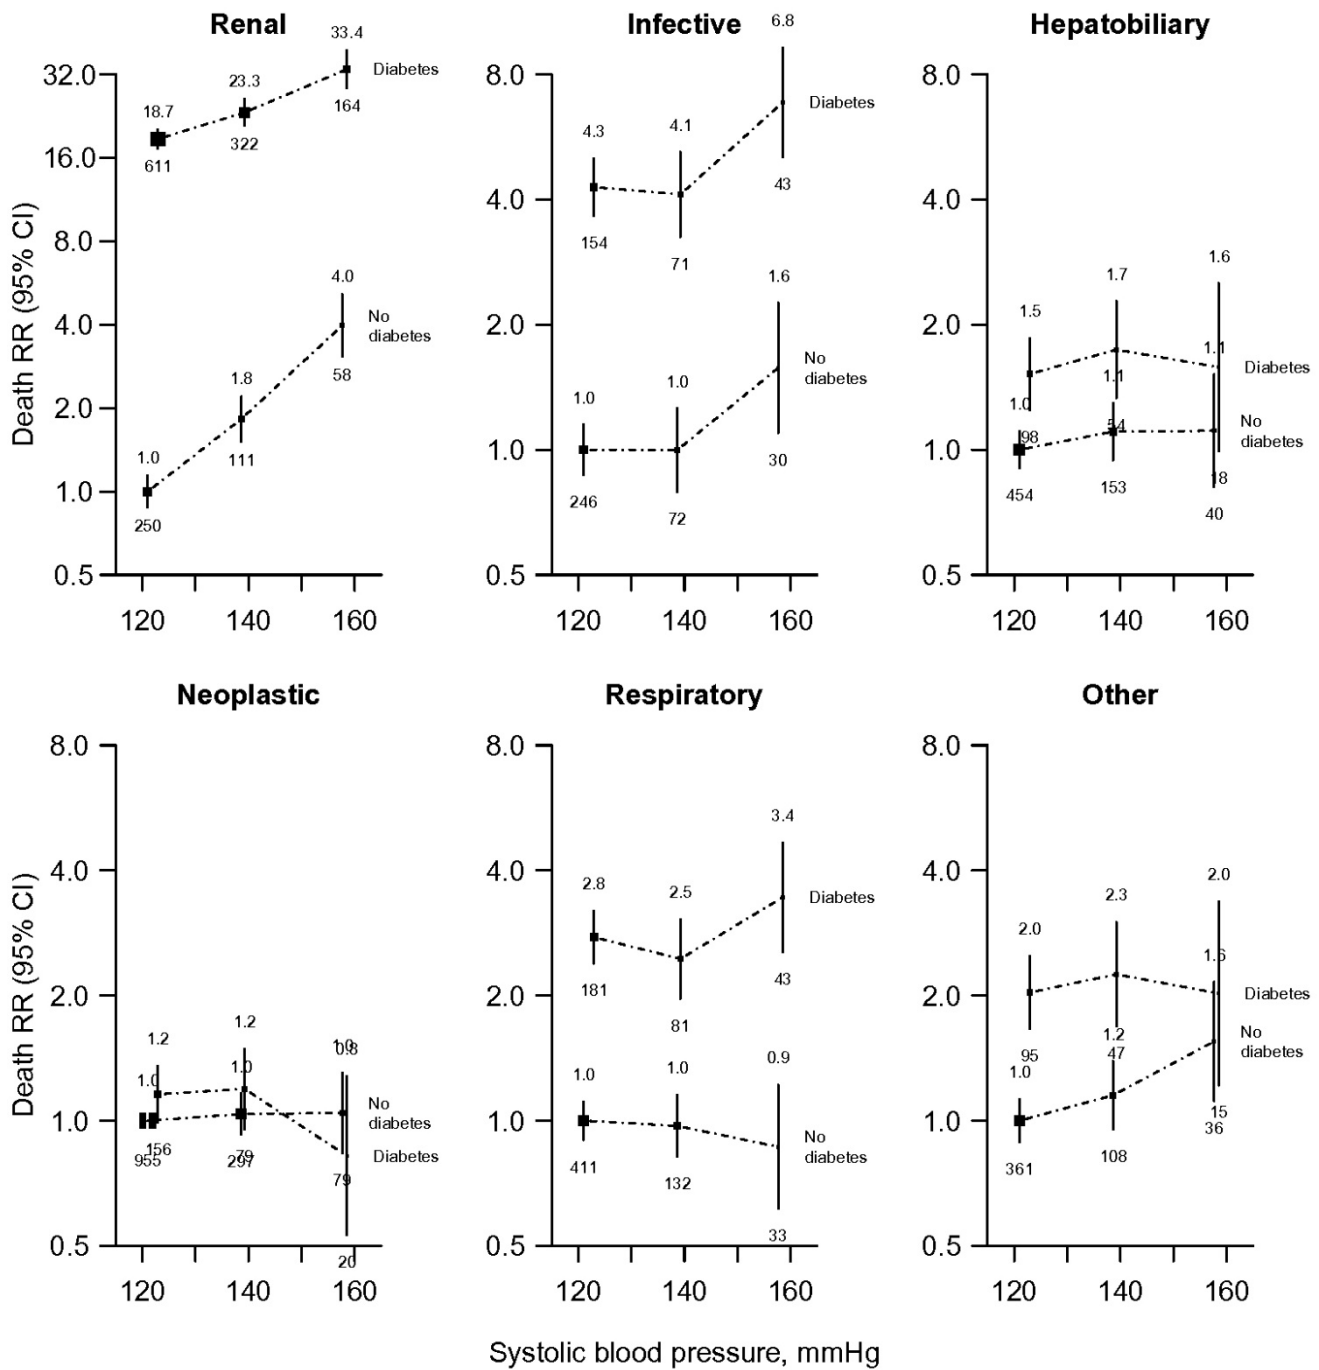

Analyses and exclusions as for Figure 1, but now separately by, instead of adjusted for, diabetes. Infective endpoint excludes respiratory infections (which are included in respiratory).

**eTable 1: Numbers of Deaths at Ages 35 to 74 Years by Underlying Cause (ICD-10 code)**

| <b>Underlying cause of death</b> | <b>ICD-10 codes (and number of deaths)</b>                                                                                                                                                                                                                                                                                                                                                                                                                                                                                                                                                                                                                                                                                                                                                                                                                                                                                                                                                                                                                                                                                                                                                                                                                                                                                                                                                                                                                  |
|----------------------------------|-------------------------------------------------------------------------------------------------------------------------------------------------------------------------------------------------------------------------------------------------------------------------------------------------------------------------------------------------------------------------------------------------------------------------------------------------------------------------------------------------------------------------------------------------------------------------------------------------------------------------------------------------------------------------------------------------------------------------------------------------------------------------------------------------------------------------------------------------------------------------------------------------------------------------------------------------------------------------------------------------------------------------------------------------------------------------------------------------------------------------------------------------------------------------------------------------------------------------------------------------------------------------------------------------------------------------------------------------------------------------------------------------------------------------------------------------------------|
| Stroke (n=574)                   | I600 (1), I602 (1), I608 (1), I609 (57), I61 (1), I610 (1), I612 (1), I614 (1), I615 (2), I618 (1), I619 (178), I620 (7), I629 (3), I633 (2), I634 (11), I635 (2), I638 (2), I639 (44), I649 (1), I64X (77), I669 (5), I671 (6), I672 (1), I673 (1), I674 (2), I678 (56), I679 (86), I693 (4), I694 (3), I698 (16)                                                                                                                                                                                                                                                                                                                                                                                                                                                                                                                                                                                                                                                                                                                                                                                                                                                                                                                                                                                                                                                                                                                                          |
| IHD (n=1406)                     | I200 (4), I209 (2), I210 (16), I211 (8), I219 (1270), I221 (1), I249 (7), I251 (30), I252 (1), I255 (1), I258 (6), I259 (60)                                                                                                                                                                                                                                                                                                                                                                                                                                                                                                                                                                                                                                                                                                                                                                                                                                                                                                                                                                                                                                                                                                                                                                                                                                                                                                                                |
| Other vascular (n=528)           | E115 (25), E145 (25), I050 (1), I051 (1), I059 (13), I070 (1), I071 (2), I080 (2), I081 (1), I091 (1), I099 (13), I110 (72), I119 (8), I260 (2), I269 (53), I270 (6), I272 (2), I279 (6), I301 (1), I319 (1), I330 (5), I340 (3), I348 (1), I350 (11), I351 (1), I358 (1), I38X (5), I420 (7), I429 (1), I442 (5), I443 (1), I460 (1), I469 (8), I471 (1), I472 (2), I489 (2), I48X (5), I490 (4), I500 (35), I501 (10), I509 (47), I515 (1), I518 (2), I519 (10), I710 (5), I712 (1), I713 (4), I714 (1), I718 (3), I719 (1), I729 (1), I739 (2), I741 (1), I771 (11), I776 (1), I802 (6), I803 (1), I822 (1), I828 (1), I829 (3), I830 (1), I872 (4), I879 (1), I99X (2), K550 (52), K551 (1), K552 (1), K559 (5), K761 (1), Q210 (1), Q231 (1), Q238 (1), Q248 (1), R570 (8)                                                                                                                                                                                                                                                                                                                                                                                                                                                                                                                                                                                                                                                                             |
| Renal (n=1516)                   | E102 (6), E112 (655), E122 (1), E142 (285), I120 (79), I129 (2), I130 (1), I131 (1), I132 (21), N002 (1), N039 (23), N049 (1), N059 (3), N10X (2), N12X (7), N142 (1), N151 (9), N170 (1), N179 (64), N180 (9), N185 (17), N189 (135), N19X (34), N200 (6), N201 (1), N289 (1), N390 (148), Q619 (1), Y841 (1)                                                                                                                                                                                                                                                                                                                                                                                                                                                                                                                                                                                                                                                                                                                                                                                                                                                                                                                                                                                                                                                                                                                                              |
| Infective (n=616)                | A047 (2), A060 (1), A090 (12), A099 (28), A09X (10), A170 (1), A180 (1), A181 (1), A182 (1), A183 (1), A188 (1), A199 (3), A415 (1), A419 (155), A483 (1), A498 (1), A810 (2), A86X (2), B200 (1), B201 (1), B207 (2), B208 (6), B210 (1), B212 (1), B227 (1), B238 (4), B24X (5), B690 (2), B948 (1), G009 (3), G039 (4), G049 (6), G060 (1), H440 (1), K052 (1), K222 (1), K223 (2), K228 (1), K251 (3), K254 (8), K255 (7), K256 (2), K259 (5), K264 (5), K265 (2), K269 (1), K274 (3), K275 (1), K290 (5), K291 (2), K292 (1), K295 (3), K297 (1), K318 (6), K352 (4), K353 (3), K358 (4), K359 (1), K572 (2), K578 (4), K579 (9), K610 (2), K611 (1), K650 (9), K658 (1), K659 (47), K920 (8), K921 (1), K922 (95), L021 (3), L022 (6), L023 (1), L024 (1), L031 (3), L038 (1), L039 (3), L089 (18), L899 (3), L89X (4), L905 (1), L984 (5), M009 (1), M600 (2), M725 (1), M726 (12), M798 (22), M869 (2), N410 (1), N498 (6), N499 (1), N719 (1), N739 (2), N764 (1)                                                                                                                                                                                                                                                                                                                                                                                                                                                                                  |
| Hepatobiliary (n=817)            | B169 (2), B171 (21), B181 (2), B182 (8), B189 (1), B190 (2), I850 (12), I859 (4), K563 (1), K701 (18), K702 (1), K703 (131), K704 (13), K709 (12), K711 (2), K716 (1), K720 (6), K721 (39), K729 (139), K739 (2), K742 (1), K743 (3), K745 (1), K746 (221), K750 (9), K754 (2), K759 (1), K766 (10), K767 (10), K769 (15), K800 (4), K801 (7), K802 (2), K803 (4), K804 (1), K805 (3), K810 (15), K811 (3), K819 (4), K822 (1), K829 (5), K830 (14), K831 (2), K852 (4), K858 (7), K859 (22), K85X (23), K861 (2), K868 (3), Q447 (1)                                                                                                                                                                                                                                                                                                                                                                                                                                                                                                                                                                                                                                                                                                                                                                                                                                                                                                                       |
| Neoplastic (n=1586)              | C029 (7), C049 (1), C069 (1), C07X (1), C089 (1), C109 (3), C119 (1), C139 (1), C140 (3), C159 (11), C160 (2), C169 (146), C170 (6), C179 (1), C182 (1), C184 (1), C187 (2), C189 (89), C19X (4), C20X (15), C220 (38), C221 (14), C229 (82), C23X (20), C240 (7), C241 (8), C248 (3), C249 (14), C250 (19), C259 (71), C260 (2), C269 (2), C319 (1), C329 (12), C33X (1), C349 (126), C37X (1), C383 (1), C384 (1), C412 (2), C414 (1), C419 (6), C437 (1), C438 (1), C439 (12), C445 (1), C447 (1), C449 (5), C450 (1), C451 (1), C459 (3), C469 (1), C479 (1), C480 (9), C482 (5), C492 (3), C499 (7), C509 (147), C519 (2), C539 (87), C541 (13), C549 (2), C55X (10), C56X (78), C609 (1), C61X (48), C629 (1), C64X (60), C679 (18), C680 (2), C709 (2), C710 (13), C711 (1), C718 (1), C719 (28), C729 (1), C73X (19), C741 (1), C749 (1), C751 (1), C759 (1), C760 (4), C763 (2), C764 (1), C765 (1), C780 (4), C786 (1), C787 (8), C788 (2), C793 (2), C794 (3), C795 (1), C796 (1), C798 (2), C800 (23), C809 (11), C80X (1), C817 (1), C819 (8), C829 (1), C833 (10), C838 (1), C839 (2), C844 (1), C845 (1), C851 (1), C857 (1), C859 (37), C900 (29), C901 (1), C902 (1), C910 (21), C911 (1), C920 (25), C921 (6), C927 (2), C929 (2), C950 (1), C959 (3), C97X (1), D371 (2), D372 (1), D374 (3), D376 (6), D377 (1), D380 (2), D381 (4), D383 (2), D391 (2), D410 (2), D419 (1), D430 (7), D432 (1), D449 (1), D486 (1), D487 (5), D489 (2) |
| Respiratory* (n=881)             | A162 (8), A165 (1), A169 (2), B206 (2), B441 (1), B909 (1), E848 (1), J069 (1), J09 (3), J100 (2), J111 (1), J151 (3), J157 (1), J159 (21), J180 (48), J181 (25), J182 (1), J188 (1), J189 (380), J209 (3), J22X (16), J348 (1), J391 (1), J42X (12), J439 (20), J440 (71), J448 (4), J449 (112), J459 (9), J46X (2), J47X (2), J60X (1), J64X (5), J677 (1), J679 (2), J680 (1), J690 (1), J80X (1), J81X (3), J841 (65), J849 (6), J850 (1), J852 (1), J869 (5), J90X (3), J939 (1), J960 (2), J961 (1), J969 (1), J980 (1), J981 (1), J984 (10), J985 (4), J988 (7), Q311 (1)                                                                                                                                                                                                                                                                                                                                                                                                                                                                                                                                                                                                                                                                                                                                                                                                                                                                            |

IHD=Ischemic heart disease. \*Includes respiratory infections.

**eTable 2: Baseline Characteristics of 7461 Participants Without Prior Chronic Disease and Aged 75 to 84 Years at Recruitment**

|                                                       | Baseline systolic blood pressure (participants) |                          |                          |                          |                         |                      | Overall<br>(n=7461) |
|-------------------------------------------------------|-------------------------------------------------|--------------------------|--------------------------|--------------------------|-------------------------|----------------------|---------------------|
|                                                       | <125 mmHg<br>(n=1732)                           | 125-134 mmHg<br>(n=1792) | 135-144 mmHg<br>(n=1636) | 145-154 mmHg<br>(n=1075) | 155-164 mmHg<br>(n=632) | ≥165 mmHg<br>(n=594) |                     |
| Age, years                                            | 79 (3)                                          | 79 (3)                   | 79 (3)                   | 79 (3)                   | 79 (3)                  | 79 (3)               | 79 (3)              |
| Male                                                  | 748 (43%)                                       | 680 (38%)                | 594 (36%)                | 382 (36%)                | 197 (31%)               | 188 (32%)            | 2789 (37%)          |
| <b>Blood pressure</b>                                 |                                                 |                          |                          |                          |                         |                      |                     |
| Systolic blood pressure, mmHg                         | 116 (8)                                         | 130 (3)                  | 140 (3)                  | 150 (3)                  | 159 (3)                 | 179 (14)             | 138 (19)            |
| Diastolic blood pressure, mmHg                        | 75 (8)                                          | 83 (7)                   | 87 (8)                   | 89 (9)                   | 92 (10)                 | 97 (13)              | 85 (11)             |
| Taking blood pressure lowering medication             | 344 (20%)                                       | 538 (30%)                | 593 (36%)                | 453 (42%)                | 296 (47%)               | 337 (57%)            | 2561 (34%)          |
| <b>Socio-economic status and lifestyle behaviours</b> |                                                 |                          |                          |                          |                         |                      |                     |
| Resident of Coyoacán                                  | 480 (28%)                                       | 592 (33%)                | 586 (36%)                | 381 (35%)                | 218 (34%)               | 264 (44%)            | 2521 (34%)          |
| University/college educated                           | 46 (3%)                                         | 72 (4%)                  | 70 (4%)                  | 36 (3%)                  | 16 (3%)                 | 21 (4%)              | 261 (3%)            |
| Current smoker                                        | 259 (15%)                                       | 249 (14%)                | 226 (14%)                | 149 (14%)                | 86 (14%)                | 65 (11%)             | 1034 (14%)          |
| Current drinker                                       | 1203 (69%)                                      | 1254 (70%)               | 1106 (68%)               | 729 (68%)                | 432 (68%)               | 395 (66%)            | 5119 (69%)          |
| Any regular leisure-time physical activity            | 349 (20%)                                       | 357 (20%)                | 301 (18%)                | 218 (20%)                | 114 (18%)               | 132 (22%)            | 1471 (20%)          |
| <b>Physical measurements</b>                          |                                                 |                          |                          |                          |                         |                      |                     |
| BMI, kg/m <sup>2</sup>                                | 26.7 (4.4)                                      | 27.6 (4.5)               | 27.9 (4.7)               | 28.0 (4.6)               | 28.2 (4.6)              | 28.1 (4.7)           | 27.6 (4.6)          |
| Waist circumference, cm                               | 95 (11)                                         | 97 (11)                  | 97 (11)                  | 98 (11)                  | 97 (11)                 | 97 (11)              | 97 (11)             |
| Hip circumference, cm                                 | 101 (10)                                        | 103 (11)                 | 104 (10)                 | 104 (11)                 | 104 (10)                | 104 (10)             | 103 (10)            |
| <b>Diabetes and glycosylated hemoglobin</b>           |                                                 |                          |                          |                          |                         |                      |                     |
| Diabetes status                                       |                                                 |                          |                          |                          |                         |                      |                     |
| No diabetes                                           | 1298 (75%)                                      | 1284 (72%)               | 1171 (72%)               | 749 (70%)                | 462 (73%)               | 410 (69%)            | 5374 (72%)          |
| Undiagnosed diabetes                                  | 102 (6%)                                        | 115 (6%)                 | 119 (7%)                 | 88 (8%)                  | 39 (6%)                 | 32 (5%)              | 495 (7%)            |
| Diagnosed diabetes with HbA1c <9%                     | 225 (13%)                                       | 272 (15%)                | 243 (15%)                | 179 (17%)                | 84 (13%)                | 100 (17%)            | 1103 (15%)          |
| Diagnosed diabetes with 9 ≤ HbA1c <11%                | 69 (4%)                                         | 80 (4%)                  | 59 (4%)                  | 41 (4%)                  | 38 (6%)                 | 31 (5%)              | 318 (4%)            |
| Diagnosed diabetes with HbA1c ≥ 11%                   | 38 (2%)                                         | 41 (2%)                  | 44 (3%)                  | 18 (2%)                  | 9 (1%)                  | 21 (4%)              | 171 (2%)            |
| <b>Medication use</b>                                 |                                                 |                          |                          |                          |                         |                      |                     |
| Any anti-thrombotic                                   | 90 (5%)                                         | 88 (5%)                  | 77 (5%)                  | 53 (5%)                  | 37 (6%)                 | 39 (7%)              | 384 (5%)            |
| Any lipid lowering                                    | 11 (1%)                                         | 9 (1%)                   | 11 (1%)                  | 7 (1%)                   | 5 (1%)                  | 2 (<0.5%)            | 45 (1%)             |

Mean (SD) or n (column %) shown. BMI=Body mass index. Table excludes those with prior chronic disease at recruitment (ischemic heart disease, stroke, chronic kidney disease, cirrhosis, cancer, emphysema), missing or out-of-range data on any analysis covariate (sex, district of residence, educational level attained, anthropometry, smoking status, alcohol intake, leisure time physical activity, diabetes status), uncertain follow-up, or missing or out-of-range blood pressure (defined as SBP <80 or >250 mmHg, DBP <40 or >150 mmHg, or pulse pressure <15 mmHg).

**eTable 3: Baseline Characteristics of 9031 Resurveyed Participants Without Prior Chronic Disease and Aged 35 to 74 Years at Original Study Recruitment, by Sex**

|                                                       | <b>Men<br/>(n=2705)</b> | <b>Women<br/>(n=6326)</b> | <b>All<br/>(n=9031)</b> |
|-------------------------------------------------------|-------------------------|---------------------------|-------------------------|
| Age, years                                            | 52 (10)                 | 50 (10)                   | 51 (10)                 |
| <b>Blood pressure</b>                                 |                         |                           |                         |
| Systolic blood pressure, mmHg                         | 128 (15)                | 127 (16)                  | 127 (16)                |
| Diastolic blood pressure, mmHg                        | 85 (10)                 | 83 (10)                   | 83 (10)                 |
| Taking blood pressure lowering medication             | 219 (8%)                | 917 (14%)                 | 1136 (13%)              |
| <b>Socio-economic status and lifestyle behaviours</b> |                         |                           |                         |
| Resident of Coyoacán                                  | 1536 (57%)              | 3285 (52%)                | 4821 (53%)              |
| University/college educated                           | 516 (19%)               | 571 (9%)                  | 1087 (12%)              |
| Current smoker                                        | 1420 (52%)              | 1291 (20%)                | 2711 (30%)              |
| Current drinker                                       | 2336 (86%)              | 4422 (70%)                | 6758 (75%)              |
| Any regular leisure-time physical activity            | 813 (30%)               | 1083 (17%)                | 1896 (21%)              |
| <b>Physical measurements</b>                          |                         |                           |                         |
| BMI, kg/m <sup>2</sup>                                | 28.2 (4.1)              | 29.9 (5.1)                | 29.4 (4.9)              |
| Waist circumference, cm                               | 97 (10)                 | 94 (12)                   | 94 (11)                 |
| Hip circumference, cm                                 | 101 (7)                 | 107 (11)                  | 105 (10)                |
| <b>Diabetes and glycosylated hemoglobin</b>           |                         |                           |                         |
| Diabetes status                                       |                         |                           |                         |
| No diabetes                                           | 2307 (85%)              | 5411 (86%)                | 7718 (85%)              |
| Undiagnosed diabetes                                  | 143 (5%)                | 321 (5%)                  | 464 (5%)                |
| Diagnosed diabetes with HbA1c <9%                     | 148 (5%)                | 332 (5%)                  | 480 (5%)                |
| Diagnosed diabetes with 9 ≤ HbA1c <11%                | 71 (3%)                 | 145 (2%)                  | 216 (2%)                |
| Diagnosed diabetes with HbA1c ≥ 11%                   | 36 (1%)                 | 117 (2%)                  | 153 (2%)                |
| <b>Medication use</b>                                 |                         |                           |                         |
| Any anti-thrombotic                                   | 42 (2%)                 | 146 (2%)                  | 188 (2%)                |
| Any lipid lowering                                    | 12 (<0.5%)              | 27 (<0.5%)                | 39 (<0.5%)              |

Mean (SD) or n (column %) shown. BMI=Body mass index. Table excludes those with prior chronic disease at recruitment (ischemic heart disease, stroke, chronic kidney disease, cirrhosis, cancer, emphysema), missing or out-of-range baseline data on any analysis covariate (sex, district of residence, educational level attained, anthropometry, smoking status, alcohol intake, leisure time physical activity, diabetes status), uncertain follow-up, or missing or out-of-range blood pressure (at baseline or resurvey).

**eTable 4: Comparison of the Informativeness of Different Blood Pressure Indices (Measured Only Once) for Stroke, Ischemic Heart Disease (IHD) and Vascular Mortality Rates at Ages 35 to 74 Years**

| <b>Blood pressure index</b>                | <b>Relative informativeness* for</b> |                      |                           |
|--------------------------------------------|--------------------------------------|----------------------|---------------------------|
|                                            | <b>Stroke mortality</b>              | <b>IHD mortality</b> | <b>Vascular mortality</b> |
| Systolic blood pressure (SBP)              | 100%                                 | 100%                 | 100%                      |
| Diastolic blood pressure (DBP)             | 69%                                  | 52%                  | 62%                       |
| Mid blood pressure (1/2 SBP + 1/2 DBP)     | 98%                                  | 90%                  | 95%                       |
| Mean arterial pressure (2/3 DBP + 1/3 SBP) | 93%                                  | 81%                  | 89%                       |
| Pulse pressure (SBP - DBP)                 | 54%                                  | 69%                  | 60%                       |

IHD=Ischemic heart disease. \*Informativeness of the given index (as indicated by the age-stratified and confounder-adjusted  $\chi^2$  statistic relating it to cause-specific mortality), as a percentage of the informativeness of the systolic blood pressure. Estimates of the informativeness of each blood pressure index are adjusted for age, sex, location, education alcohol intake, leisure-time physical activity, anthropometry and diabetes status.
